# Supplementary material for: Self-Reported Measures of Periodontitis in a Portuguese Population: A Validation Study
Source: MDPI journal article supplement (doi:10.3390/jpm12081315), 2022-08-14
Supplement: s1 [file s1]

*Supplementary information*

# Self-Reported Measures of Periodontitis in a Portuguese Population: A Validation Study

Vanessa Machado\* <sup>1,2,†</sup>, Patrícia Lyra <sup>1,†</sup>, Catarina Santos <sup>1</sup>, Luís Proença <sup>1,2,3</sup>, José João Mendes <sup>1,2</sup>, João Botelho <sup>1,2</sup>

<sup>1</sup> Clinical Research Unit, Centro de Investigação Interdisciplinar Egas Moniz (CiiEM), Egas Moniz — Cooperativa de Ensino Superior, 2829-511 Almada, Portugal

<sup>2</sup> Evidence-Based Hub, CiiEM, Egas Moniz — Cooperativa de Ensino Superior, 2829-511 Almada, Portugal;

<sup>3</sup> Quantitative Methods for Health Research, CiiEM, Egas Moniz — Cooperativa de Ensino Superior, 2829-511 Almada, Portugal.

<sup>†</sup> These authors contributed equally to this work as first authors.

\* Correspondence: vmachado@egasmoniz.edu.pt (V.M.).

**Supplementary Table S1.** Responses to questions stratified by periodontitis status according to the EFP/AAP 2018 and CDC/AAP 2012 case definitions and respective severe staging.

| Variable                              | Total<br>(N=103) | EFP/AAP 2018<br>Periodontitis<br>(n=63) | EFP/AAP 2018<br>Severe<br>Periodontitis<br>(n=39) | CDC/AAP 2012<br>Periodontitis<br>(n=71) | CDC/AAP 2012<br>Severe<br>Periodontitis<br>(n=56) |
|---------------------------------------|------------------|-----------------------------------------|---------------------------------------------------|-----------------------------------------|---------------------------------------------------|
| <b>Gum disease</b>                    |                  |                                         |                                                   |                                         |                                                   |
| Yes                                   | 56 (54.4)        | 35 (55.6)                               | 39 (100)                                          | 32 (45.1)                               | 30 (53.6)                                         |
| No                                    | 39 (37.9)        | 22 (34.9)                               | 0 (0.0)                                           | 39 (54.9)                               | 26 (46.4)                                         |
| Refused   Don't Know                  | 8 (7.8)          | 6 (9.5)                                 | 0 (0.0)                                           | 0 (0.0)                                 | 0 (0.0)                                           |
| <b>Teeth/gum health</b>               |                  |                                         |                                                   |                                         |                                                   |
| Excellent   Very good                 | 19 (18.4)        | 0 (0.0)                                 | 0 (0.0)                                           | 1 (1.4)                                 | 0 (0.0)                                           |
| Good   Fair   Poor                    | 84 (81.6)        | 63 (100)                                | 39 (100)                                          | 70 (98.6)                               | 56 (100)                                          |
| Refused   Don't Know                  | 0 (0.0)          | 0 (0.0)                                 | 0 (0.0)                                           | 0 (0.0)                                 | 0 (0.0)                                           |
| <b>Had gum treatment</b>              |                  |                                         |                                                   |                                         |                                                   |
| Yes                                   | 84 (81.6)        | 63 (100)                                | 39 (100)                                          | 70 (98.6)                               | 56 (100)                                          |
| No                                    | 19 (18.4)        | 0 (0.0)                                 | 0 (0.0)                                           | 1 (1.4)                                 | 0 (0.0)                                           |
| Refused   Don't Know                  | 0 (0.0)          | 0 (0.0)                                 | 0 (0.0)                                           | 0 (0.0)                                 | 0 (0.0)                                           |
| <b>Loose tooth</b>                    |                  |                                         |                                                   |                                         |                                                   |
| Yes                                   | 36 (35)          | 33 (52.4)                               | 24 (61.5)                                         | 33 (46.5)                               | 30 (53.6)                                         |
| No                                    | 67 (65)          | 30 (47.6)                               | 15 (38.5)                                         | 38 (53.5)                               | 26 (46.4)                                         |
| Refused   Don't Know                  | 0 (0.0)          | 0 (0.0)                                 | 0 (0.0)                                           | 0 (0.0)                                 | 0 (0.0)                                           |
| <b>Lost bone</b>                      |                  |                                         |                                                   |                                         |                                                   |
| Yes                                   | 40 (38.8)        | 37 (58.7)                               | 26 (66.7)                                         | 40 (56.3)                               | 36 (64.3)                                         |
| No                                    | 62 (60.2)        | 26 (41.3)                               | 13 (33.3)                                         | 31 (43.7)                               | 20 (35.7)                                         |
| Refused   Don't Know                  | 1 (1.0)          | 0 (0.0)                                 | 0 (0.0)                                           | 0 (0.0)                                 | 0 (0.0)                                           |
| <b>Tooth does not look right</b>      |                  |                                         |                                                   |                                         |                                                   |
| Yes                                   | 55 (53.4)        | 44 (69.8)                               | 30 (76.9)                                         | 47 (66.2)                               | 40 (71.4)                                         |
| No                                    | 48 (46.6)        | 19 (30.2)                               | 9 (23.1)                                          | 24 (33.8)                               | 16 (28.6)                                         |
| Refused   Don't Know                  | 0 (0.0)          | 0 (0.0)                                 | 0 (0.0)                                           | 0 (0.0)                                 | 0 (0.0)                                           |
| <b>Floss use</b>                      |                  |                                         |                                                   |                                         |                                                   |
| Never                                 | 47 (45.6)        | 31 (49.2)                               | 20 (51.3)                                         | 34 (47.9)                               | 27 (48.2)                                         |
| 1-7 times                             | 56 (54.4)        | 32 (50.8)                               | 19 (48.7)                                         | 37 (52.1)                               | 29 (51.8)                                         |
| Refused   Don't Know                  | 0 (0.0)          | 0 (0.0)                                 | 0 (0.0)                                           | 0 (0.0)                                 | 0 (0.0)                                           |
| <b>Gum bleeding</b>                   |                  |                                         |                                                   |                                         |                                                   |
| Yes                                   | 15 (14.6)        | 15 (23.8)                               | 9 (23.1)                                          | 15 (21.1)                               | 12 (21.4)                                         |
| No                                    | 88 (85.4)        | 48 (76.2)                               | 30 (76.9)                                         | 56 (78.9)                               | 44 (78.6)                                         |
| Refused   Don't Know                  | 0 (0.0)          | 0 (0.0)                                 | 0 (0.0)                                           | 0 (0.0)                                 | 0 (0.0)                                           |
| <b>Gum bleeding last 3 months</b>     |                  |                                         |                                                   |                                         |                                                   |
| Very often   Fairly often   Sometimes | 44 (42.7)        | 31 (49.2)                               | 19 (48.7)                                         | 33 (46.5)                               | 25 (44.6)                                         |
| Never   Hardly ever                   | 59 (57.3)        | 32 (50.8)                               | 20 (51.3)                                         | 38 (53.5)                               | 31 (55.4)                                         |
| <b>Loose teeth loss</b>               |                  |                                         |                                                   |                                         |                                                   |
| Yes                                   | 22 (21.4)        | 21 (33.3)                               | 14 (35.9)                                         | 21 (29.6)                               | 20 (35.7)                                         |
| No                                    | 81 (78.6)        | 42 (66.7)                               | 25 (64.1)                                         | 50 (70.4)                               | 36 (64.3)                                         |
| Refused   Don't Know                  | 0 (0.0)          | 0 (0.0)                                 | 0 (0.0)                                           | 0 (0.0)                                 | 0 (0.0)                                           |
| <b>Gum pain</b>                       |                  |                                         |                                                   |                                         |                                                   |
| Yes                                   | 24 (23.3)        | 18 (28.6)                               | 10 (25.6)                                         | 19 (26.8)                               | 14 (25)                                           |
| No                                    | 79 (76.7)        | 45 (71.4)                               | 29 (74.4)                                         | 52 (73.2)                               | 42 (75)                                           |

|                       |           |           |           |           |           |
|-----------------------|-----------|-----------|-----------|-----------|-----------|
| Refused   Don't Know  | 0 (0.0)   | 0 (0.0)   | 0 (0.0)   | 0 (0.0)   | 0 (0.0)   |
| <b>Gum retraction</b> |           |           |           |           |           |
| Yes                   | 34 (33.0) | 27 (42.9) | 21 (53.8) | 32 (45.1) | 25 (44.6) |
| No                    | 67 (65.0) | 35 (55.6) | 17 (43.6) | 38 (53.5) | 30 (53.6) |
| Refused   Don't Know  | 2 (1.9)   | 1 (1.6)   | 1 (2.6)   | 1 (1.4)   | 1 (1.8)   |
| <b>Roots visible</b>  |           |           |           |           |           |
| Yes                   | 31 (30.1) | 26 (41.3) | 19 (48.7) | 29 (40.8) | 23 (41.1) |
| No                    | 72 (69.9) | 37 (58.7) | 20 (51.3) | 42 (59.2) | 33 (58.9) |
| Refused   Don't Know  | 0 (0.0)   | 0 (0.0)   | 0 (0.0)   | 0 (0.0)   | 0 (0.0)   |
